# Supplementary material
Source: publisher figshare collection journal article supplement (https://tandf.figshare.com/articles/dataset/_/10058756)
Supplement: Supplementary file 1 [file 1]

## **eAppendix 4: During exercise effects of nasal high-flow**

### Primary outcomes

There was no available data for any of the primary outcomes.

### Secondary outcomes

#### Blood oxygen saturation

COPD patients randomized to the NHF group showed a significant increase in isotime SaO<sub>2</sub> (MD 3 %, 95% CI 2 to 4).

#### Dyspnea

Dyspnea was assessed using the BORG scale which is measured from 0 (no dyspnea) to 10 (maximum dyspnea). NHF significantly reduced isotime dyspnea (MD -4.5, 95% CI -6.5 to -2.5).

#### Exercise capacity

There was a significant difference between NHF and oxygen in endurance capacity in favor of NHF (MD 109 s, 95% CI 50 to 168).

#### Adverse event

The study did not report any adverse event.
