# Supplementary material
Source: publisher figshare collection journal article supplement (https://tandf.figshare.com/articles/dataset/_/10058756)
Supplement: Supplementary file 2 [file 1]

## eAppendix 5: supplementary figures.

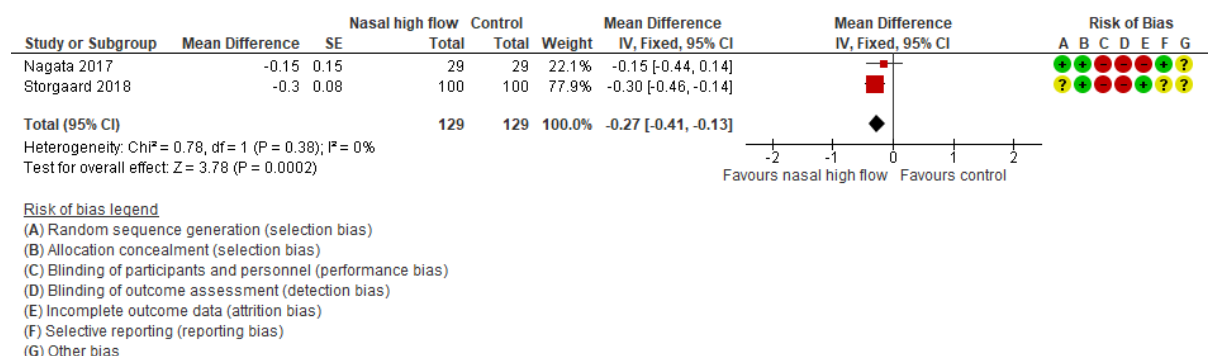

**Figure S1:** Long-term effects of nasal high-flow on dyspnea (dyspnea Modified Research Council scale).

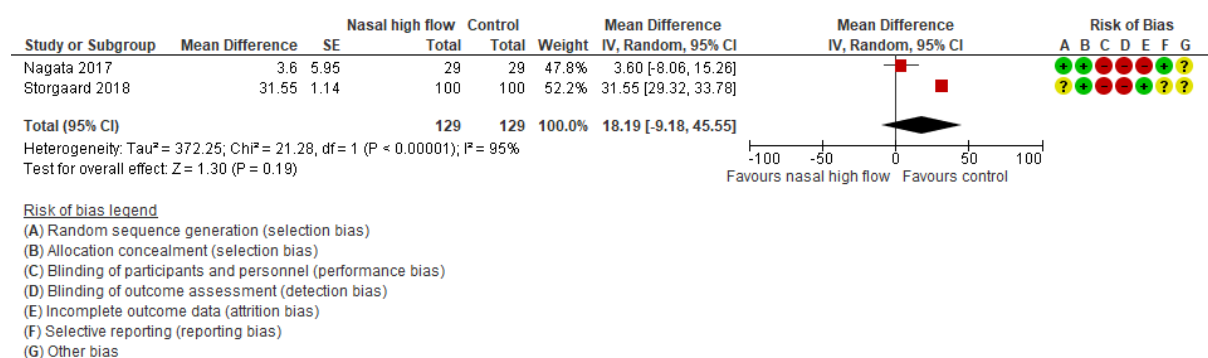

**Figure S2:** Long-term effects of nasal high-flow on exercise capacity (six-minute walk test, meters).

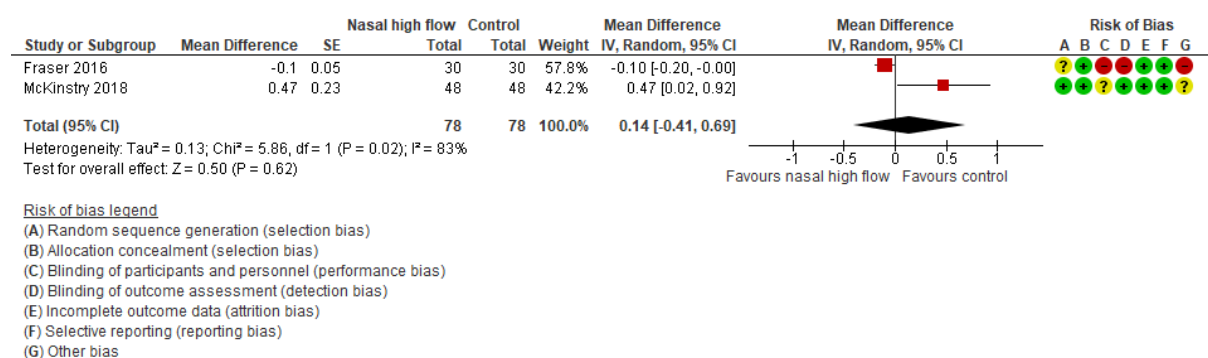

**Figure S3:** Short-term effects of nasal high-flow on blood oxygen saturation (%).

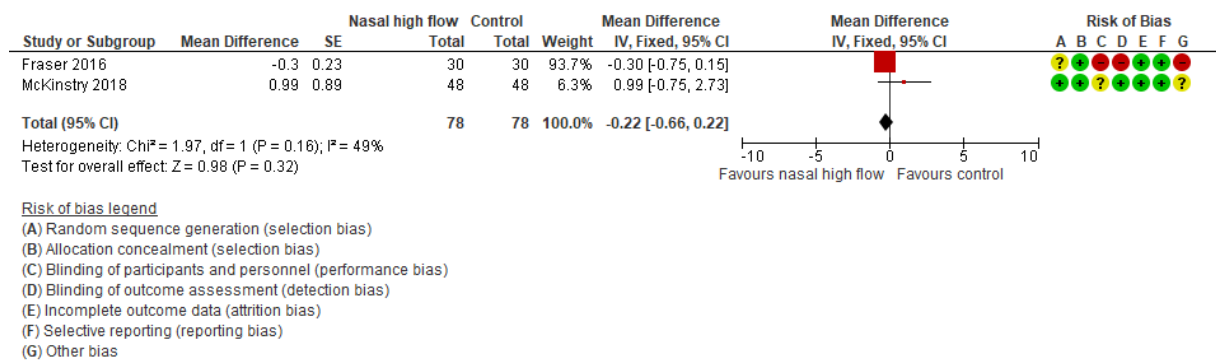

**Figure S4:** Short-term effects of nasal high-flow on heart rate (beat per minute).

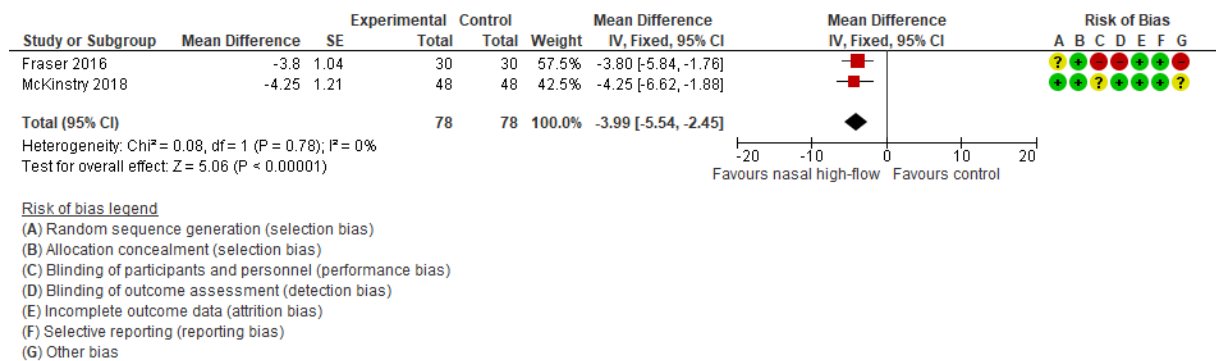

**Figure S5:** Short-term effects of nasal high-flow on respiratory rate (cycle per minute).
