# Supplementary material
Source: publisher figshare collection journal article supplement (https://tandf.figshare.com/articles/dataset/_/10058756)
Supplement: Supplementary file 5 [file 1]

## Appendix 2: detailed evaluation of the risk of bias.

| Risk of bias – Nagata et al. 2017                              |                    |                                                                                                                                                                                              |
|----------------------------------------------------------------|--------------------|----------------------------------------------------------------------------------------------------------------------------------------------------------------------------------------------|
| Bias                                                           | Authors' judgement | Support for judgement                                                                                                                                                                        |
| <i>Random sequence generation (selection bias)</i>             | Low                | « Randomization was performed at Translational Research Informatics Center, Kobe, Japan, using permuted block method with block sizes of 2 and 4 »                                           |
| <i>Allocation concealment (selection bias)</i>                 | Low                | « Institution and patient registration will be performed using the centralized registration system following the procedure below. » complete data are available in online data supplement    |
| <i>Blinding : participant and personnel (performance bias)</i> | High               | « First, the subjects were not blinded to treatment, and therefore, those receiving the intervention may have overreported improvements in subjective outcomes, such as health-related QOL » |
| <i>Blinding : outcome assessment (detection bias)</i>          | High               | As above                                                                                                                                                                                     |
| <i>Incomplete outcome data (attrition bias)</i>                | High               | Intention-to-treat, flow chart<br><br>According to the flow-chart, 13 patients were analysed out of the 14 patients included                                                                 |
| <i>Selective reporting (reporting bias)</i>                    | Low                | Important outcomes reported<br>All outcomes are announced in NCT registration.                                                                                                               |
| <i>Other</i>                                                   | Unclear            | « Tomii K reports honoraria from Teijin Pharma Limited »<br>« Primary Source of Funding: Teijin Pharma Limited »<br>No washout period                                                        |

---

**Risk of bias – Storgaard et al. 2018**

---

| <b>Bias</b>                                                    | <b>Authors' judgement</b> | <b>Support for judgement</b>                                                                                                                                                                                                                                                                                                                                                                                                       |
|----------------------------------------------------------------|---------------------------|------------------------------------------------------------------------------------------------------------------------------------------------------------------------------------------------------------------------------------------------------------------------------------------------------------------------------------------------------------------------------------------------------------------------------------|
| <i>Random sequence generation (selection bias)</i>             | Unclear                   | « In this randomized, prospective trial a total of 200 patients were included from 4 outpatient clinics in the North Jutland Region of Denmark between December 2013 and July 2015 » but no more details                                                                                                                                                                                                                           |
| <i>Allocation concealment (selection bias)</i>                 | Low                       | « By the use of numbered sealed envelopes containing group allocations, patients were randomly assigned to either LTOT (controls) or LTOT plus HFNC home treatment »                                                                                                                                                                                                                                                               |
| <i>Blinding : participant and personnel (performance bias)</i> | High                      | No placebo treatment<br>« A randomized blinded study could have been wished for, however, blinding the patients against the ow, the heat and the humidity is not realistic »                                                                                                                                                                                                                                                       |
| <i>Blinding : outcome assessment (detection bias)</i>          | High                      | As above                                                                                                                                                                                                                                                                                                                                                                                                                           |
| <i>Incomplete outcome data (attrition bias)</i>                | Low                       | Intention-to-treat, flow-chart<br><br>« The analysis population was defined as all subjects randomized to treatment and who had no major protocol deviations affecting efficacy data, giving 100% inclusion of all 200 subjects enrolled. As such, data were included on patients who discontinued the study or paused treatment and those who discontinued HFNC but stayed in the study, in the HFNC group (intention-to-treat) » |
| <i>Selective reporting (reporting bias)</i>                    | Unclear                   | All outcomes are not reported in ClinicalTrials<br><br>Data are not included in the text and tables of the study                                                                                                                                                                                                                                                                                                                   |

---

---

|              |         |                                                                                                                                 |
|--------------|---------|---------------------------------------------------------------------------------------------------------------------------------|
| <i>Other</i> | Unclear | « Hans-Ulrich Hockey received remuneration from Fisher & Paykel, who also contributed equipment and some administration costs » |
|--------------|---------|---------------------------------------------------------------------------------------------------------------------------------|

---

| <b>Risk of bias – Fraser et al. 2016</b>                       |                           |                                                                                                                                                                                                                                                                                                                                                                                                                                                                                                                                      |
|----------------------------------------------------------------|---------------------------|--------------------------------------------------------------------------------------------------------------------------------------------------------------------------------------------------------------------------------------------------------------------------------------------------------------------------------------------------------------------------------------------------------------------------------------------------------------------------------------------------------------------------------------|
| <b>Bias</b>                                                    | <b>Authors' judgement</b> | <b>Support for judgement</b>                                                                                                                                                                                                                                                                                                                                                                                                                                                                                                         |
| <i>Random sequence generation (selection bias)</i>             | Unclear                   | « After the baseline period the patient will be randomised using sealed opaque envelopes »<br>no more information                                                                                                                                                                                                                                                                                                                                                                                                                    |
| <i>Allocation concealment (selection bias)</i>                 | Low                       | « The order of therapy was allocated using sequentially-numbered, sealed envelopes which were not prepared by study staff »                                                                                                                                                                                                                                                                                                                                                                                                          |
| <i>Blinding : participant and personnel (performance bias)</i> | High                      | No placebo treatment                                                                                                                                                                                                                                                                                                                                                                                                                                                                                                                 |
| <i>Blinding : outcome assessment (detection bias)</i>          | High                      | As above                                                                                                                                                                                                                                                                                                                                                                                                                                                                                                                             |
| <i>Incomplete outcome data (attrition bias)</i>                | Low                       | Intention-to-treat, flow-chart                                                                                                                                                                                                                                                                                                                                                                                                                                                                                                       |
| <i>Selective reporting (reporting bias)</i>                    | Low                       | Important outcomes reported<br>All outcomes are announced in ANZCTR registration.                                                                                                                                                                                                                                                                                                                                                                                                                                                    |
| <i>Other</i>                                                   | High                      | « We studied only males thus the results seen cannot be generalised to women suffering COPD »<br><br>« JFF has received a research fellowship from Queensland Health Office of Health and Medical Research. JFF received an unrestricted grant from Fisher & Paykel Healthcare in support of the current study. JFF and AC have received assistance from Fisher & Paykel Healthcare to support travel and accommodation costs to attend research meetings; neither has received honoraria or consultancy fees from Fisher & Paykel » |

**Risk of bias – McKinstry et al. 2018**

| <b>Bias</b>                                                    | <b>Authors' judgement</b> | <b>Support for judgement</b>                                                                                                                                                                                                                                                                                                                                                                                          |
|----------------------------------------------------------------|---------------------------|-----------------------------------------------------------------------------------------------------------------------------------------------------------------------------------------------------------------------------------------------------------------------------------------------------------------------------------------------------------------------------------------------------------------------|
| <i>Random sequence generation (selection bias)</i>             | Low                       | « The order of administration of the four treatments was randomized. The randomisation was computer- generated by the study statistician, who had no role in the recruitment, study visits or data collection »                                                                                                                                                                                                       |
| <i>Allocation concealment (selection bias)</i>                 | Low                       | « Random allocations were sealed in sequentially numbered opaque envelopes before recruitment »                                                                                                                                                                                                                                                                                                                       |
| <i>Blinding : participant and personnel (performance bias)</i> | Unclear                   | « Our study was single-blinded in that although participants were blinded to the actual flow rate they received, they could feel the difference between low, medium and high flows »                                                                                                                                                                                                                                  |
| <i>Blinding : outcome assessment (detection bias)</i>          | Low                       | « The un-blinded investigator's role included manually counting the respiratory rate and controlling the settings on the NHF device. The blinded investigator recorded PtCO <sub>2</sub> , heart rate and StO <sub>2</sub> from the SenTec display while seated behind a screen so that they could not see the participant or myAIRVO 2 display and wearing ear plugs to avoid hearing changes to the NHF flow-rate » |
| <i>Incomplete outcome data (attrition bias)</i>                | Low                       | Intention-to-treat, flow-chart                                                                                                                                                                                                                                                                                                                                                                                        |
| <i>Selective reporting (reporting bias)</i>                    | Low                       | Important outcomes reported<br>All outcomes are announced in ANZCTR registration                                                                                                                                                                                                                                                                                                                                      |
| <i>Other</i>                                                   | Unclear                   | « The study was funded by Fisher and Paykel Healthcare New Zealand »<br>Lack of staff calculation                                                                                                                                                                                                                                                                                                                     |

| <b>Risk of bias – Nilius et al. 2013</b>                       |                           |                                                                                                             |
|----------------------------------------------------------------|---------------------------|-------------------------------------------------------------------------------------------------------------|
| <b>Bias</b>                                                    | <b>Authors' judgement</b> | <b>Support for judgement</b>                                                                                |
| <i>Random sequence generation (selection bias)</i>             | Unclear                   | « The study design consisted of a randomized crossover design » but no more details                         |
| <i>Allocation concealment (selection bias)</i>                 | Unclear                   | Information not available                                                                                   |
| <i>Blinding : participant and personnel (performance bias)</i> | High                      | No placebo treatment                                                                                        |
| <i>Blinding : outcome assessment (detection bias)</i>          | High                      | As above                                                                                                    |
| <i>Incomplete outcome data (attrition bias)</i>                | Unclear                   | Information not available                                                                                   |
| <i>Selective reporting (reporting bias)</i>                    | Unclear                   | No full-text available<br>No registration number available                                                  |
| <i>Other</i>                                                   | High                      | No full-text available<br>“This abstract is funded by:<br>The study was supported by<br>TNImedical Germany” |

| <b>Risk of bias – Cirio et al. 2016</b>                        |                           |                                                                                                                               |
|----------------------------------------------------------------|---------------------------|-------------------------------------------------------------------------------------------------------------------------------|
| <b>Bias</b>                                                    | <b>Authors' judgement</b> | <b>Support for judgement</b>                                                                                                  |
| <i>Random sequence generation (selection bias)</i>             | Unclear                   | « we performed a randomized crossover study » but no more details                                                             |
| <i>Allocation concealment (selection bias)</i>                 | Unclear                   | Information not available                                                                                                     |
| <i>Blinding : participant and personnel (performance bias)</i> | Unclear                   | Single-blind but « Another limitation is the lack of blinding, difficult to be performed using the specific device for HFNC » |
| <i>Blinding : outcome assessment (detection bias)</i>          | High                      | Single-blind for participants                                                                                                 |
| <i>Incomplete outcome data (attrition bias)</i>                | Low                       | Lack of flow-chart<br>All participants included were analyzed                                                                 |
| <i>Selective reporting (reporting bias)</i>                    | High                      | HR and blood pressure are not reported                                                                                        |
| <i>Other</i>                                                   | Low                       | No other bias seems to be present                                                                                             |
